# Supplementary material
Source: Springer Nature journal article supplement (https://www.springermedizin.de/resource/supplementary/12885_2012_3849_MOESM2_ESM.pdf/9464592)

**Vehicle**

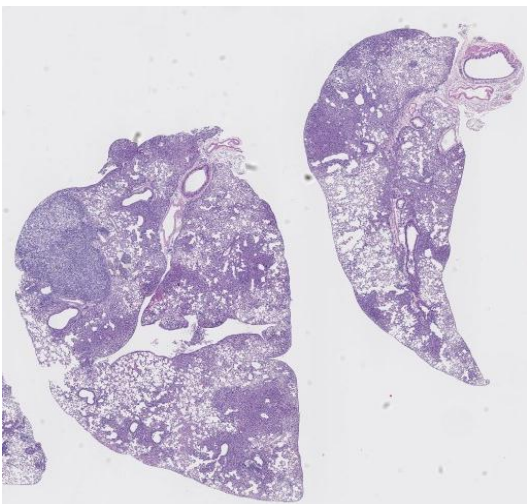

**PF-210**

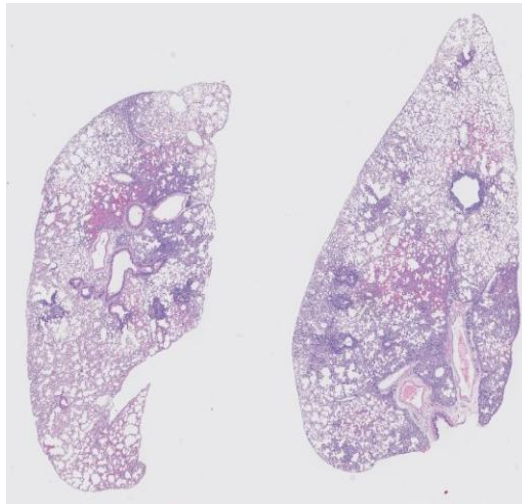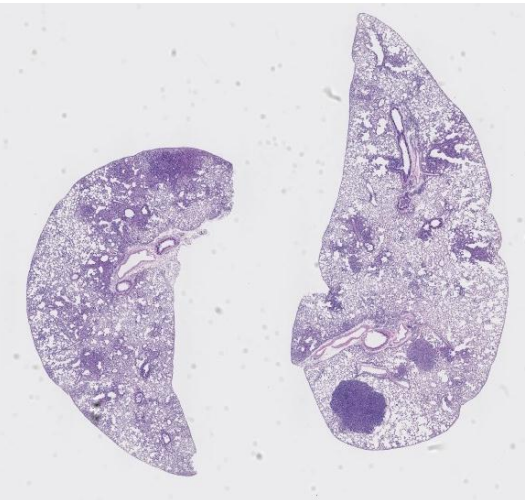

**axitinib**

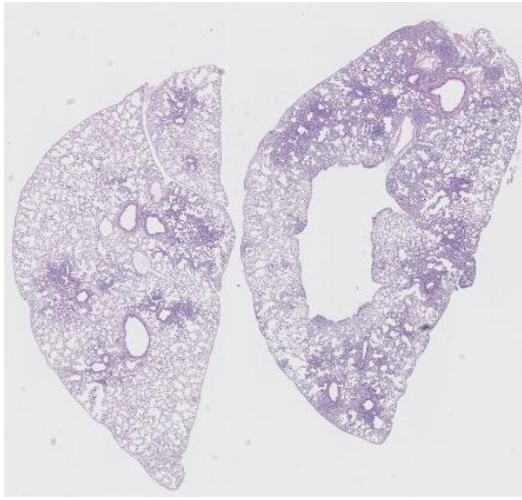

**sunitinib**

Supplement: MOESM2 [file 9464592]
